# Supplementary material
Source: Springer Nature journal article supplement (https://www.springermedizin.de/resource/supplementary/12891_2013_2208_MOESM3_ESM.pdf/9509660)

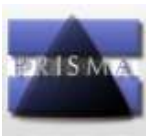

# PRISMA 2009 Flow Diagram

Identification

Screening

Eligibility

Included

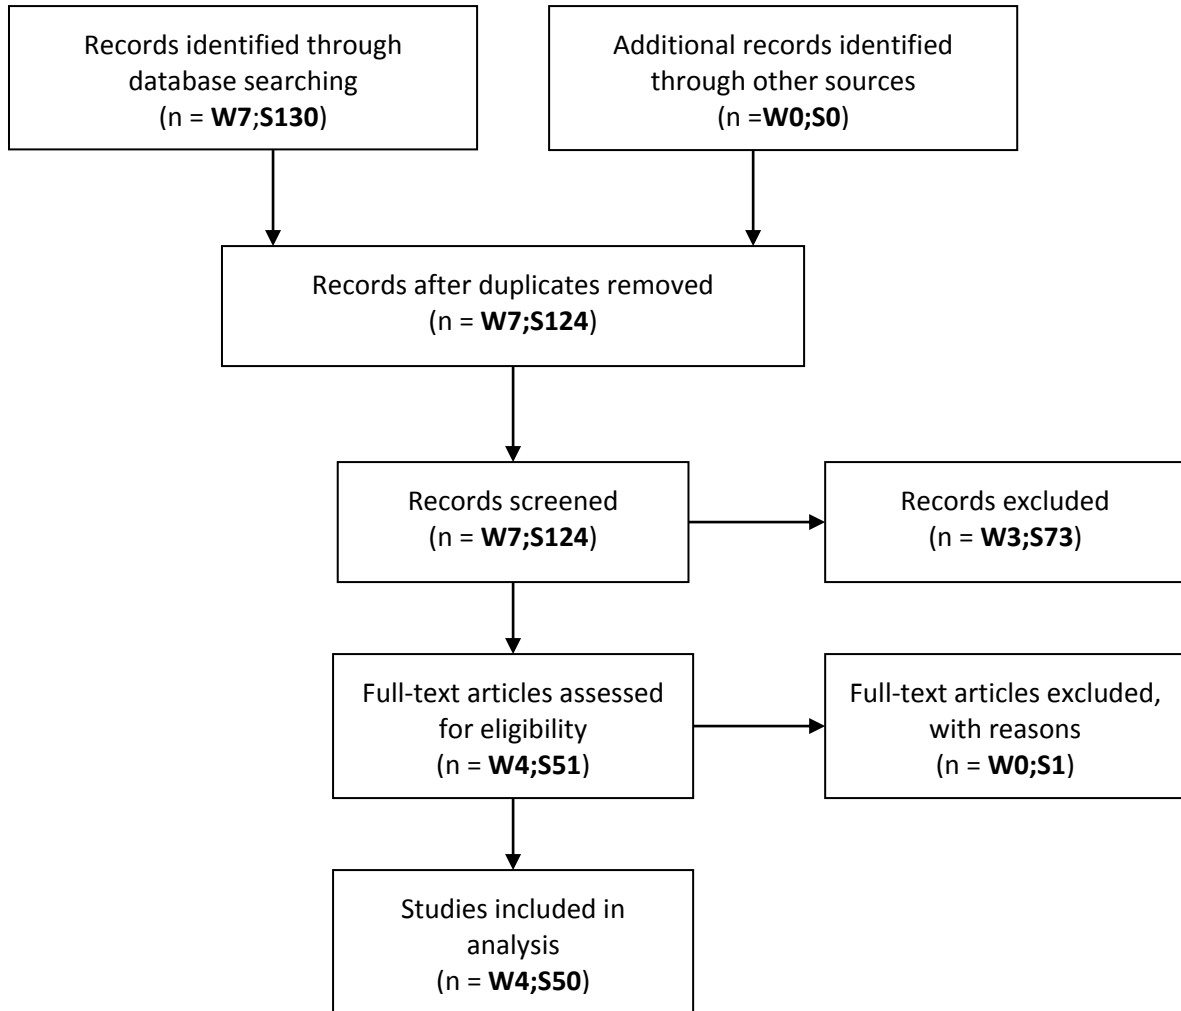

Supplement: MOESM3 [file 9509660]
